# Supplementary material for: Evaluating the Impact of the COVID-19 Pandemic on New Cancer Diagnoses and Oncology Care in Manitoba
Source: MDPI journal article supplement (doi:10.3390/curroncol28040269), 2021-08-12
Supplement: s1 [file s1]

## Supplementary Materials:

# Evaluating the Impact of the COVID-19 Pandemic on New Cancer Diagnoses and Oncology Care in Manitoba

Kathleen M. Decker, Pascal Lambert, Allison Feely, Oliver Bucher, Julian O. Kim, Pamela Hebbard, Maclean Thiessen, Tunji Fatoye, Marshall Pitz, Rashmi Koul, and Piotr Czaykowski

Table S1. Linear regression results.

|                                |               |        | Estimate<br>(95% Confidence Interval) | p-Value |
|--------------------------------|---------------|--------|---------------------------------------|---------|
| Cancer diagnoses               | Intercept     |        | 543.50 (509.62–577.37)                | <0.001  |
|                                | COVID-19      |        | -1946.94 (-3211.06– -682.81)          | 0.003   |
|                                | Time          |        | 0.94 (0.41–1.47)                      | 0.001   |
|                                | Month         | '      | 6.24 (-49.20–61.69)                   |         |
|                                |               | "      | 59.24 (0.35–118.14)                   |         |
|                                |               | '''    | -87.40 (-143.11– -31.69)              |         |
|                                |               | ''''   | 57.87 (9.28–106.47)                   | 0.003   |
|                                |               | '''''  | -53.19 (-131.65–25.27)                |         |
|                                |               | '''''' | -1.22 (-41.59–39.15)                  |         |
|                                | COVID-19:Time |        | 28.27 (9.27–47.26)                    | 0.004   |
| Pathology reports              | Intercept     |        | 2753.21 (2579.25–2927.18)             | <0.001  |
|                                | COVID-19      |        | -7548.30 (-11233.57– -3863.03)        | <0.001  |
|                                | Time          |        | 3.89 (1.14–6.64)                      | 0.006   |
|                                | Month         | '      | 141.04 (-135.09–417.17)               |         |
|                                |               | "      | 561.53 (254.00–869.06)                |         |
|                                |               | '''    | -355.44 (-641.46– -69.42)             |         |
|                                |               | ''''   | 487.20 (241.25–733.16)                | <0.001  |
|                                |               | '''''  | 109.76 (-300.74–524.27)               |         |
|                                |               | '''''' | 161.57 (-40.28–363.41)                |         |
|                                | COVID-19:Time |        | 107.84 (53.69–161.98)                 | <0.001  |
| Surgery                        | Intercept     |        | 1216.39 (1142.11–1290.68)             | <0.001  |
|                                | COVID-19      |        | -739033.58 (-1548491.14–70423.98)     | 0.073   |
|                                | Time          | '      | 12.97 (-101.34–127.28)                |         |
|                                |               | "      | 59.38 (-32.33–151.08)                 | 0.416   |
|                                | Month         | '      | 133.31 (16.91–249.70)                 |         |
|                                |               | "      | 252.81 (127.72–377.90)                |         |
|                                |               | '''    | -237.36 (-351.52– -123.19)            |         |
|                                |               | ''''   | 445.91 (346.89–544.92)                | <0.001  |
|                                |               | '''''  | -11.15 (-170.98–148.68)               |         |
|                                |               | '''''' | 70.80 (-11.46–153.05)                 |         |
| Intravenous chemotherapy       | COVID-19:Time | '      | 1237521.19 (-121931.90–2596974.28)    | <0.001  |
|                                |               | "      | 406433.82 (-36855.86–849723.50)       |         |
|                                | Intercept     |        | 1724.45 (1616.55–1832.35)             | <0.001  |
|                                | COVID-19      |        | 13.80 (-153.91–181.50)                | 0.870   |
|                                | Time          | '      | 108.85 (-17.16–234.86)                |         |
|                                |               | "      | -87.46 (-215.45–40.53)                |         |
|                                |               | '''    | -81.84 (-381.84–218.17)               | 0.325   |
|                                |               | ''''   | 1.14 (-246.19–248.47)                 |         |
|                                | Month         | '      | 64.30 (-82.13–210.72)                 |         |
|                                |               | "      | -49.26 (-130.39–31.88)                | 0.308   |
| Radiotherapy treatment (first) | Intercept     |        | 338.68 (310.72–366.64)                | <0.001  |

|                                         |           |        |                               |        |
|-----------------------------------------|-----------|--------|-------------------------------|--------|
|                                         | COVID-19  |        | -15.47 (-54.16–23.23)         | 0.428  |
|                                         | Time      | '      | 9.87 (-19.08–38.81)           |        |
|                                         |           | ''     | 22.58 (-6.91–52.07)           | 0.024  |
|                                         |           | '''    | 3.91 (-65.06–72.88)           |        |
|                                         |           | ''''   | 42.89 (-14.24–100.03)         |        |
|                                         | Month     | '      | -38.00 (-74.59– -1.41)        |        |
|                                         |           | ''     | 40.13 (2.36–77.90)            |        |
|                                         |           | '''    | -57.04 (-93.63– -20.45)       | <0.001 |
|                                         |           | ''''   | 56.00 (24.52–87.47)           |        |
|                                         |           | '''''  | -32.10 (-82.38–18.19)         |        |
|                                         |           | '''''' | -52.31 (-78.43– -26.18)       |        |
| <b>Radiotherapy fractions</b>           | Intercept |        | 3880.59 (3607.31–4153.88)     | <0.001 |
|                                         | COVID-19  |        | -563.19 (-816.57– -309.81)    | <0.001 |
|                                         | Time      |        | 0.95 (-3.49–5.38)             | 0.671  |
|                                         | Month     | '      | 76.12 (-368.47–520.71)        |        |
|                                         |           | ''     | 788.62 (327.16–1250.08)       |        |
|                                         |           | '''    | -59.70 (-501.93–382.53)       | 0.002  |
|                                         |           | ''''   | 611.19 (228.08–994.30)        |        |
|                                         |           | '''''  | 292.19 (-321.76–906.15)       |        |
|                                         |           | '''''' | -108.16 (-425.12–208.81)      |        |
| <b>Urgent cancer care clinic visits</b> | Intercept |        | 200.67 (188.38–212.97)        | <0.001 |
|                                         | COVID-19  |        | -32.94 (-45.64– -20.24)       | <0.001 |
|                                         | Time      |        | -0.32 (-0.54– -0.10)          | 0.006  |
|                                         | Month     | '      | 12.52 (-2.83–27.87)           |        |
|                                         |           | ''     | -1.20 (-26.23–23.84)          | 0.193  |
|                                         |           | '''    | -7.86 (-19.04–3.32)           |        |
| <b>In-person visits</b>                 | Intercept |        | 9249.00 (8283.53–10214.48)    | <0.001 |
|                                         | COVID-19  |        | -5606.68 (-6701.30– -4512.06) | <0.001 |
|                                         | Time      |        | 65.47 (-8.51–139.44)          | 0.079  |
|                                         | Month     | '      | 2244.09 (1101.43–3386.75)     |        |
|                                         |           | ''     | 59.47 (-1724.81–1843.74)      | 0.006  |
|                                         |           | '''    | -28.30 (-791.86–735.25)       |        |
| <b>All visits</b>                       | Intercept |        | 9464.62 (8624.16–10305.08)    | <0.001 |
|                                         | COVID-19  |        | -72.25 (-983.14–838.65)       | 0.868  |
|                                         | Time      |        | 66.37 (4.92–127.82)           | 0.036  |
|                                         | Month     | '      | 5.28 (-1212.12–1222.69)       |        |
|                                         |           | ''     | 1218.44 (-1.46–2438.34)       |        |
|                                         |           | '''    | -863.17 (-2205.27–478.94)     | 0.061  |
|                                         |           | ''''   | 1729.38 (664.35–2794.40)      |        |
|                                         |           | '''''  | 225.08 (-1690.60–2140.76)     |        |
|                                         |           | '''''' | -336.50 (-1251.96–578.96)     |        |

Abbreviations: ', splines.

**Table S2.** Ratios and 95% confidence intervals (CI) between predicted and expected values.

| Outcome                                | Average          | Ratio (95% CI)   |                  |                  |
|----------------------------------------|------------------|------------------|------------------|------------------|
|                                        |                  | Apr 2020         | Sep 2020         | Dec 2020         |
| Cancer diagnoses*                      |                  | 0.77 (0.67–0.87) | 1.00 (0.90–1.11) |                  |
| Pathology reports*                     |                  | 0.79 (0.70–0.88) |                  | 1.07 (0.98–1.16) |
| Surgery*                               |                  | 0.57 (0.45–0.70) | 0.99 (0.88–1.11) |                  |
| IV chemotherapy                        | 1.01 (0.91–1.11) |                  |                  |                  |
| RT treatment (first)                   | 0.96 (0.85–1.06) |                  |                  |                  |
| RT fractions                           | 0.87 (0.81–0.93) |                  |                  |                  |
| Urgent Cancer Care clinic (UCC) visits | 0.82 (0.75–0.89) |                  |                  |                  |
| In-person visits                       | 0.48 (0.38–0.58) |                  |                  |                  |
| All visits                             | 0.99 (0.91–1.08) |                  |                  |                  |

Abbreviations: CI, confidence interval; RT, radiotherapy; IV, intravenous.

\* Significant COVID-19 by time interaction.
